# Supplementary material
Source: MDPI journal article supplement (https://www.mdpi.com/2571-8797/5/2/32)

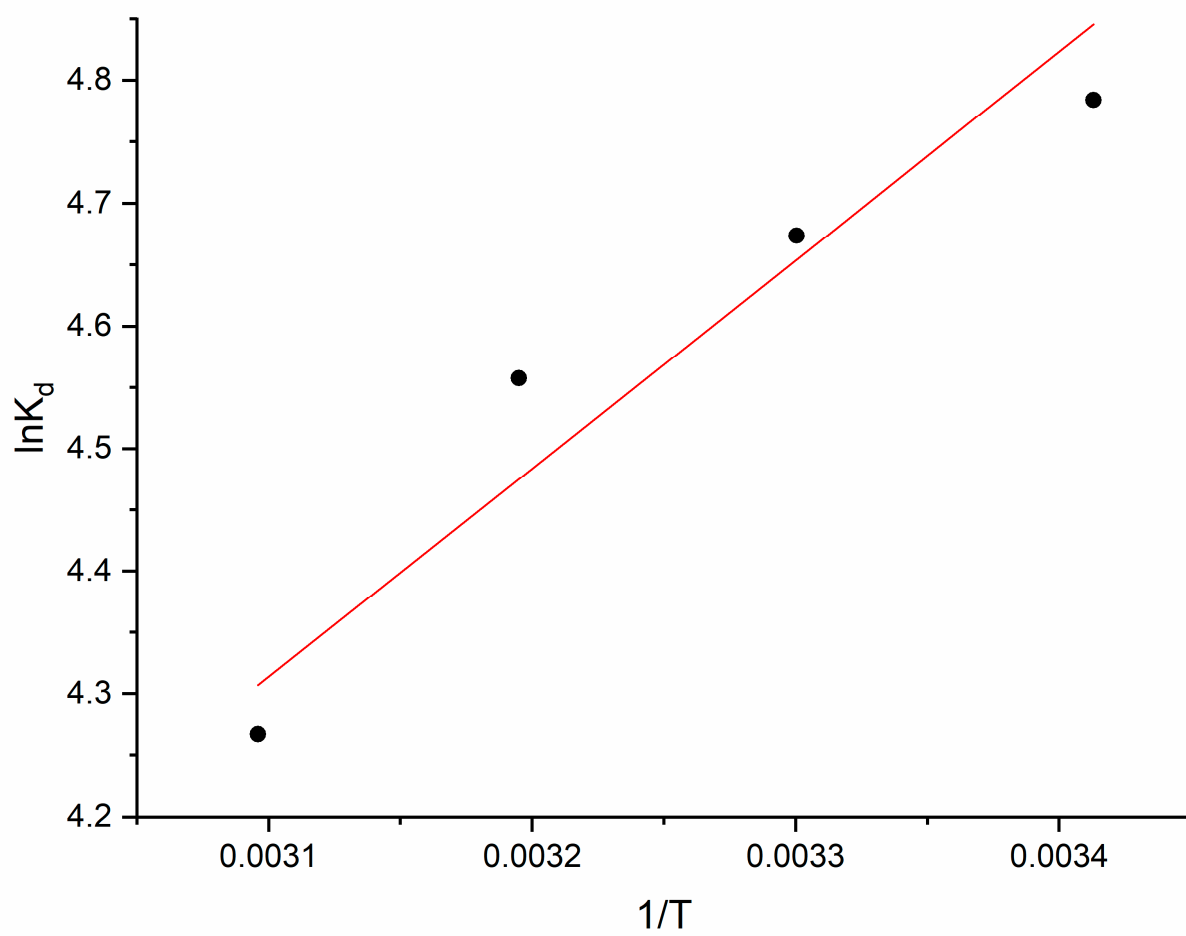

**Figure S1.**  $\ln K_d$  versus  $1/T$

Supplement: s1 [file s1]
